# Supplementary material
Source: MDPI journal article supplement (https://www.mdpi.com/2073-4344/12/11/1429)
Supplement: s1 [file s1]

## Supporting Information

### **Study on optimum preparation conditions of ZnIn<sub>2</sub>S<sub>4</sub> to effectively reduce Cr(VI) under visible light radiation**

Yali Song<sup>1\*</sup>, Huan Zhang<sup>1</sup>, Ziyang Li<sup>1</sup>, Long Huang<sup>2</sup>, Junhao Xie<sup>1</sup>, Long Han<sup>1</sup>, Ruoying Zheng<sup>1</sup>, Yuqing Zhang<sup>1</sup>, Hongzhong Zhang<sup>1\*</sup>

1. Department of Material and Chemical Engineering, Henan Collaborative Innovation Centre of Environmental Pollution Control and Ecological Restoration, Zhengzhou University of Light Industry, Zhengzhou 450001, P.R. China

2. School of Ecology and Environment, Zhengzhou University, Zhengzhou 450001, P.R. China

\* Correspondence: songyl@zzuli.edu.cn (Y.L.S.), zhz@zzuli.edu.cn (H.Z.Z.)

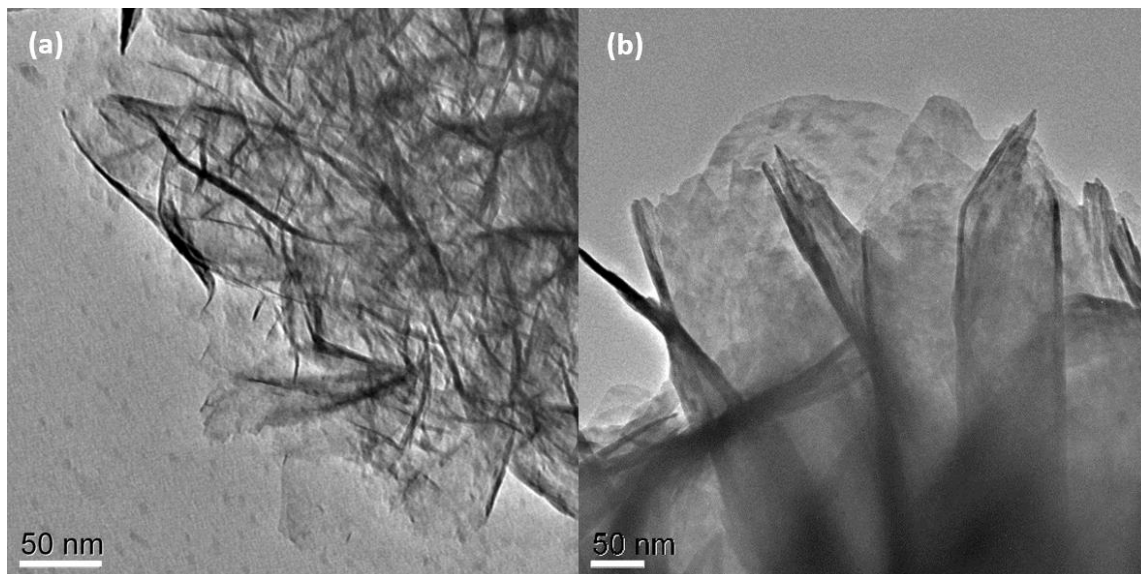

Figure S1 TEM of EG-120 (a) and EG-180 (b)

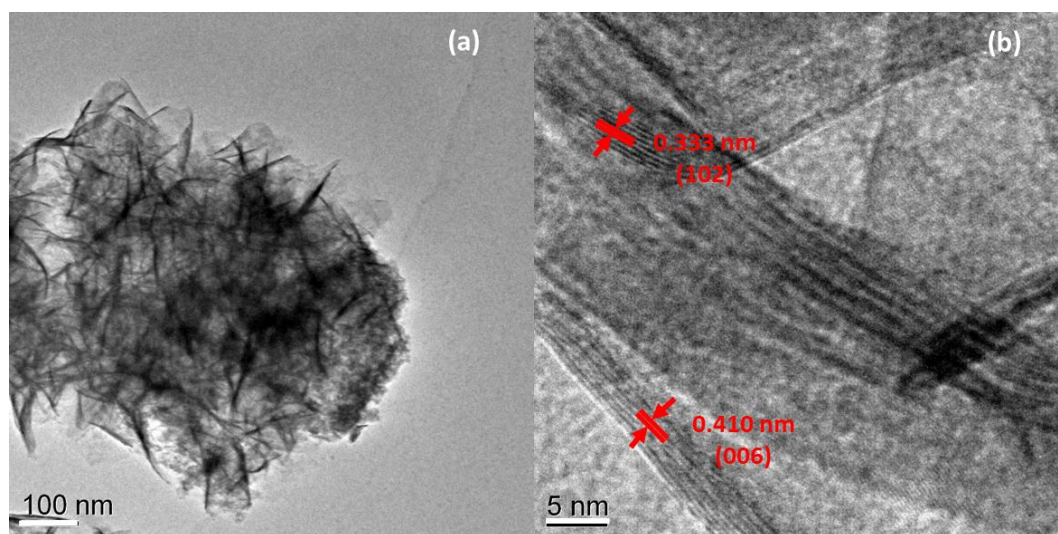

Figure S2 TEM (a) and HRTEM (b) of EG-120

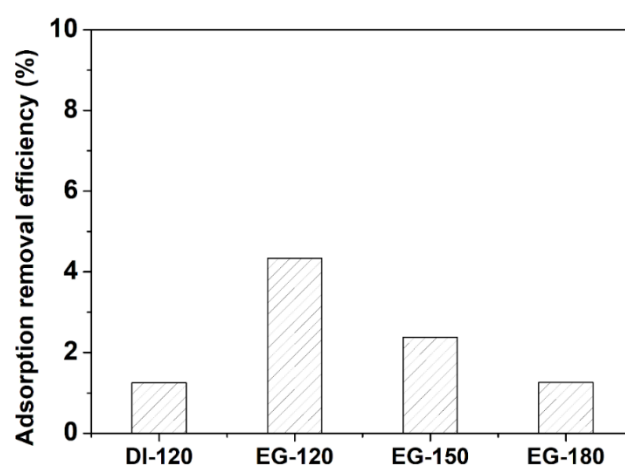

Figure S3 Adsorption removal efficiencies of Cr(VI) by different  $\text{ZnIn}_2\text{S}_4$  in the dark

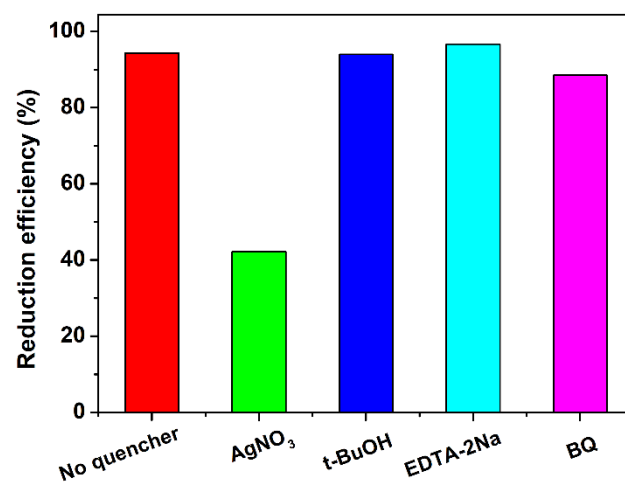

Figure S4 Photocatalytic removal efficiencies of Cr(VI) by EG-120 in the presence of different quenchers
